# Supplementary material for: Whole-genome sequencing reveals transmission pattern and drug resistance of Mycobacterium tuberculosis intra- or inter-hosts
Source: Front Cell Infect Microbiol. 2025 Jan 21;14:1488547. doi: 10.3389/fcimb.2024.1488547 (PMC11790449; doi:10.3389/fcimb.2024.1488547)
Supplement: Supplementary file 11 [file Table10.xlsx]

## Sheet: samples
Supplementary Table 10. Drug resistant results of all samples.
Patient	Sample	Lineage	Cluster	Culture-based		Genotype-based
				Resistant type	Resistant Drug	Resistant type	Resistant Drug	Resistant Mutation
0000191801	TBsq101	lineage 2/beijing sublineage	TBsq101,TBsq102	MDR	Cs;INH;Sm;RFP;RFB;EMB	MDR	INH;RFP;RFB;Sm;PZA;EMB	INH:ahpC:-48G/A;RFP:rpoB:H445D;RFB:rpoB:H445D;Sm:rpsL:K43R;PZA:pncA:G97R;EMB:embB:G406S,ubiA:M180V
0000191801	TBsq102	lineage 2/beijing sublineage	TBsq101,TBsq102	MDR	INH;Sm;RFP;RFB;EMB	MDR	INH;RFP;RFB;Sm;PZA;EMB	INH:ahpC:-48G/A;RFP:rpoB:H445D;RFB:rpoB:H445D;Sm:rpsL:K43R;PZA:pncA:G97R;EMB:embB:G406S,ubiA:M180V
0000186576	TBsq105	lineage 4	TBsq105,TBsq106	DS		DS
0000186576	TBsq106	lineage 4	TBsq105,TBsq106	DR	Cs;RFB	DS
6352504	TBsq108	lineage 2/beijing sublineage	NA			DS
0001193837	TBsq112	lineage 2/beijing sublineage	NA			Pre-XDR	INH;LFX;RFP;RFB;MFX;PZA;EMB;Eto	INH:fabG1:-15C/T;LFX:gyrA:D94G;RFP:rpoB:S450L;RFB:rpoB:S450L;MFX:gyrA:D94G;PZA:pncA:V131G,pncA:V131G,pncA:V44G;EMB:embB:M306I;Eto:fabG1:-15C/T
0001221201	TBsq115	lineage 2/beijing sublineage	NA	DR	Cs;INH;LFX;Km;EMB	Pre-XDR	PTO;INH;LFX;Cm;RFP;RFB;Sm;MFX;PZA;AK;Km	PTO:ethA:M260G;INH:fabG1:L203L,katG:S315G;LFX:gyrA:D94N;Cm:rrs:1401A/G;RFP:rpoB:H445R;RFB:rpoB:H445R;Sm:rpsL:K43R;MFX:gyrA:D94N;PZA:pncA:D12A;AK:rrs:1401A/G;Km:rrs:1401A/G
0001129183	TBsq122	lineage 2/beijing sublineage	TBsq122,TBsq123	DR	Cs	DS
0001129183	TBsq123	lineage 2/beijing sublineage	TBsq122,TBsq123	DR	Cs	DS
0007055367	TBsq131	lineage 2/beijing sublineage	NA	DS		DS
0000177055	TBsq132	lineage 4	NA			DR	INH;LFX;Cm;Cfz;MFX;EMB;AK;Km	INH:katG:S315T;LFX:gyrA:D94G;Cm:gidB:R96C;Cfz:Rv0678:D47G;MFX:gyrA:D94G;EMB:embB:M306I;AK:gidB:R96C;Km:gidB:R96C
0000144810	TBsq135	lineage 2/beijing sublineage	NA	Pre-XDR	INH;LFX;Sm;MFX;RFP;RFB;Eto;EMB	Pre-XDR	PTO;INH;LFX;RFP;RFB;Cfz;Sm;MFX;PZA;Eto	PTO:ethA:S208*;INH:fabG1:-15C/T,katG:S315T;LFX:gyrA:D94G;RFP:rpoB:S450L;RFB:rpoB:S450L;Cfz:Rv0678:D47E,Rv0678:P48P;Sm:rpsL:K43R;MFX:gyrA:D94G;PZA:pncA:V93G;Eto:fabG1:-15C/T
0000103338	TBsq136	lineage 4	TBsq136,TBsq138	DR	Cs;INH;LFX;MFX;Km	DR	INH	INH:katG:S315I,katG:S315N
0000103338	TBsq138	lineage 4	TBsq136,TBsq138			Pre-XDR	INH;LFX;RFP;RFB;MFX	INH:katG:S315I;LFX:gyrA:D94G;RFP:rpoB:H445Y;RFB:rpoB:H445Y;MFX:gyrA:D94G
0001659104	TBsq140	lineage 2/beijing sublineage	NA	Pre-XDR	INH;LFX;Sm;MFX;RFP;AK;Km	XDR	INH;LFX;Cm;RFP;Sm;Linezolid;MFX;PZA;EMB;AK;Km	INH:katG:S315T;LFX:gyrA:D94G;Cm:rrs:1401A/G;RFP:rpoB:S431G;Sm:rpsL:K43R;Linezolid:rplC:C154R;MFX:gyrA:D94G;PZA:pncA:M175V;EMB:embB:H1002R;AK:rrs:1401A/G;Km:rrs:1401A/G
0000069183	TBsq142	lineage 2/beijing sublineage	TBsq142,TBsq646	Pre-XDR	INH;LFX;MFX;RFP;RFB	Pre-XDR	INH;LFX;RFP;MFX	INH:katG:S315T;LFX:gyrA:S91P;RFP:rpoB:D435V;MFX:gyrA:S91P
0000178188	TBsq144	lineage 2/beijing sublineage	NA			DS
0005774802	TBsq146	lineage 2/beijing sublineage	TBsq146,TBsq647	DS		XDR	PTO;LFX;RFP;RFB;Sm;Linezolid;MFX;EMB	PTO:ethA:W21*;LFX:gyrA:D94N,gyrA:D94G;RFP:rpoB:H445D;RFB:rpoB:H445D;Sm:rpsL:K43R;Linezolid:rplC:C154R;MFX:gyrA:D94N,gyrA:D94G;EMB:embB:M306V
0001818044	TBsq147	lineage 2/beijing sublineage	TBsq147,TBsq148,TBsq149,TBsq95,TBsq96	Pre-XDR	Cs;INH;PAS;LFX;MFX;RFP;RFB;EMB	Pre-XDR	INH;LFX;RFP;MFX;PZA;EMB	INH:katG:S315T;LFX:gyrA:A90V;RFP:rpoB:S441P;MFX:gyrA:A90V;PZA:pncA:G55V;EMB:embB:M306V
0001818044	TBsq148	lineage 2/beijing sublineage	TBsq147,TBsq148,TBsq149,TBsq95,TBsq96	Pre-XDR	INH;LFX;MFX;RFP;EMB	Pre-XDR	INH;LFX;RFP;MFX;EMB	INH:katG:S315T;LFX:gyrA:A90V;RFP:rpoB:S441P;MFX:gyrA:A90V;EMB:embB:M306V
0001818044	TBsq149	lineage 2/beijing sublineage	TBsq147,TBsq148,TBsq149,TBsq95,TBsq96	Pre-XDR	Cs;INH;LFX;MFX;RFP;EMB	Pre-XDR	INH;LFX;RFP;MFX;PZA;EMB	INH:katG:S315T;LFX:gyrA:A90V;RFP:rpoB:S441P;MFX:gyrA:A90V;PZA:pncA:G55V;EMB:embB:M306V
0000029451	TBsq157	lineage 2/beijing sublineage	NA	DR	INH;EMB	Pre-XDR	INH;LFX;RFP;RFB;Sm;MFX;PZA;EMB;Eto	INH:fabG1:-15C/T,ahpC:-52C/T;LFX:gyrA:D94N;RFP:rpoB:S450L;RFB:rpoB:S450L;Sm:rrs:514A/C;MFX:gyrA:D94N;PZA:pncA:V130A,pncA:D56G,pncA:H51Y;EMB:embB:Q445R;Eto:fabG1:-15C/T
0000183294	TBsq16	lineage 2/beijing sublineage	NA			Pre-XDR	INH;LFX;RFP;RFB;Sm;MFX;PZA;EMB	INH:katG:S315T;LFX:gyrA:A90V,gyrA:D94A;RFP:rpoB:S450L;RFB:rpoB:S450L;Sm:rpsL:K43R;MFX:gyrA:A90V,gyrA:D94A;PZA:pncA:D136G;EMB:embB:M306V
0008207194	TBsq162		NA			DR	PTO	PTO:ethA:E428A,ethA:S424S,ethA:V418V,ethA:E318E,ethA:T316T,ethA:D315D,ethA:F302W
0003807584	TBsq169	lineage 2/beijing sublineage	TBsq169,TBsq414,TBsq638,TBsq639	Pre-XDR	Cs;INH;LFX;MFX;RFP;AK;Km;EMB	Pre-XDR	PTO;INH;LFX;Cm;RFP;RFB;MFX;PZA;EMB;AK;Km	PTO:ethA:K280K;INH:ahpC:-46-/T;LFX:gyrA:D94G;Cm:rrs:1401A/G;RFP:rpoB:H445Y;RFB:rpoB:H445Y;MFX:gyrA:D94G;PZA:pncA:Q141P;EMB:embB:G406S;AK:rrs:1401A/G;Km:rrs:1401A/G
0000179735	TBsq170	lineage 4	TBsq170,TBsq654	DS		DS
0008476012	TBsq176	lineage 4	NA	DS		DS
0000099611	TBsq181	lineage 2/beijing sublineage	TBsq181,TBsq182	Pre-XDR	Cs;INH;LFX;Sm;MFX;RFP;RFB;Eto;EMB	Pre-XDR	PTO;INH;LFX;RFP;RFB;Sm;MFX;PZA;EMB	PTO:ethA:Q347*;INH:katG:S315T;LFX:gyrA:D94G;RFP:rpoB:S450L;RFB:rpoB:S450L;Sm:rpsL:K43R;MFX:gyrA:D94G;PZA:pncA:Q10P;EMB:embB:M306I
0000099611	TBsq182	lineage 2/beijing sublineage	TBsq181,TBsq182			XDR	PTO;INH;LFX;RFP;RFB;Sm;Linezolid;MFX;PZA;EMB	PTO:ethA:Q347*;INH:katG:S315T;LFX:gyrA:D94G;RFP:rpoB:S450L;RFB:rpoB:S450L;Sm:rpsL:K43R;Linezolid:rplC:C154R;MFX:gyrA:D94G;PZA:pncA:Q10P;EMB:embB:M306I
0003463842	TBsq183	lineage 2/beijing sublineage	TBsq183,TBsq656			MDR	PAS;INH;RFP;RFB;Sm;PZA;EMB	PAS:thyA:R235P;INH:katG:S315T;RFP:rpoB:A286V,rpoB:S450L;RFB:rpoB:S450L;Sm:rpsL:K88R;PZA:pncA:G132D;EMB:embB:M306I
0008562236	TBsq20	lineage 2/beijing sublineage	TBsq20,TBsq21	Pre-XDR	INH;Sm;MFX;RFP;RFB	MDR	INH;RFP;RFB;Sm;EMB	INH:katG:S315T;RFP:rpoB:S450L;RFB:rpoB:S450L;Sm:rpsL:K43R;EMB:embB:Q497P
0002652984	TBsq201	lineage 2/beijing sublineage	TBsq201,TBsq202			Pre-XDR	INH;LFX;RFP;RFB;MFX;PZA;Eto	INH:fabG1:-15C/T,katG:V1A,ahpC:-52C/T;LFX:gyrA:G88C;RFP:rpoB:H445D;RFB:rpoB:H445D;MFX:gyrA:G88C;PZA:pncA:A146V;Eto:fabG1:-15C/T
0002652984	TBsq202	lineage 2/beijing sublineage	TBsq201,TBsq202			Pre-XDR	PTO;INH;LFX;RFP;RFB;MFX;PZA;Eto	PTO:ethA:V402V,ethA:Y235T,ethA:W167*;INH:fabG1:-15C/T,katG:V1A,ahpC:-52C/T;LFX:gyrA:G88C;RFP:rpoB:H445D;RFB:rpoB:H445D;MFX:gyrA:G88C;PZA:pncA:A146V;Eto:fabG1:-15C/T,ethA:Y235T
0003636022	TBsq208	lineage 2/beijing sublineage	NA	Pre-XDR	INH;LFX;MFX;RFP;RFB	DR	LFX;MFX;EMB	LFX:gyrA:D94N,gyrA:D94G;MFX:gyrA:D94N,gyrA:D94G;EMB:embB:G406D
0008562236	TBsq21	lineage 2/beijing sublineage	TBsq20,TBsq21	DR	Cs;INH;EMB	MDR	INH;RFP;RFB;Sm;EMB	INH:katG:S315T;RFP:rpoB:S450L;RFB:rpoB:S450L;Sm:rpsL:K43R;EMB:embB:Q497P
0008621589	TBsq213	lineage 2/beijing sublineage	NA			MDR	INH;RFP;RFB;Sm;PZA;EMB	INH:katG:S315T;RFP:rpoB:S450L;RFB:rpoB:S450L;Sm:rpsL:K88R;PZA:pncA:V131G;EMB:embB:M306V
0000034555	TBsq216	lineage 2/beijing sublineage	NA			Pre-XDR	LFX;RFP;RFB;MFX;EMB	LFX:gyrA:D94G;RFP:rpoB:S450L;RFB:rpoB:S450L;MFX:gyrA:D94G;EMB:embB:G406D
0003553948	TBsq221	lineage 2/beijing sublineage	TBsq221,TBsq327	DS		DS
0000067122	TBsq227	lineage 2/beijing sublineage	NA	Pre-XDR	INH;LFX;MFX;RFP;RFB;EMB	Pre-XDR	INH;LFX;RFP;MFX;EMB	INH:katG:S315T,iniA:2092C/-,iniC:S58S;LFX:gyrA:A90V;RFP:rpoB:H445Q;MFX:gyrA:A90V;EMB:embB:G406C
0007753492	TBsq228	lineage 2/beijing sublineage	NA			Pre-XDR	PTO;INH;LFX;RFP;RFB;Sm;MFX;PZA;EMB	PTO:ethA:A252A,ethA:L225A;INH:katG:S315T;LFX:gyrA:D94A;RFP:rpoB:S450W;RFB:rpoB:S450W;Sm:rpsL:K43R;MFX:gyrA:D94A;PZA:pncA:D158T,pncA:V131G,pncA:V131G;EMB:embB:M306I
0001089352	TBsq23	lineage 4	NA			Pre-XDR	INH;LFX;RFP;MFX;PZA	INH:katG:S315N;LFX:gyrA:D94G;RFP:rpoB:D435N;MFX:gyrA:D94G;PZA:pncA:R29R
0000160406	TBsq238	lineage 2/beijing sublineage	NA	DS		DS
0000158090	TBsq240	lineage 2/beijing sublineage	NA	DR	INH;EMB	Pre-XDR	PTO;INH;LFX;RFP;RFB;Sm;MFX;PZA;EMB;Eto	PTO:inhA:I194T;INH:fabG1:-15C/T,inhA:I194T;LFX:gyrA:A90V,gyrA:D94A;RFP:rpoB:S450L;RFB:rpoB:S450L;Sm:rpsL:K88R;MFX:gyrA:A90V,gyrA:D94A;PZA:pncA:S59P;EMB:embB:G406A;Eto:fabG1:-15C/T,inhA:I194T
0008025372	TBsq243	lineage 2/beijing sublineage	TBsq243,TBsq663	DS		DS
0000155565	TBsq249	lineage 2/beijing sublineage	NA	Pre-XDR	Cs;LFX;Sm;MFX;RFP;RFB;EMB	Pre-XDR	INH;LFX;RFP;RFB;Sm;MFX;PZA;EMB	INH:katG:S315T;LFX:gyrA:D94G;RFP:rpoB:S450L;RFB:rpoB:S450L;Sm:rpsL:K43R;MFX:gyrA:D94G;PZA:pncA:V131G;EMB:embB:M306V
0000135790	TBsq262	lineage 2/beijing sublineage	NA	DS		DS
0002562971	TBsq263	lineage 4	NA	DS		DS
0000137809	TBsq268	lineage 2/beijing sublineage	TBsq268,TBsq664			Pre-XDR	INH;LFX;RFP;RFB;MFX;PZA;EMB	INH:ahpC:-52C/T;LFX:gyrB:E501D,gyrA:S91P;RFP:rpoB:S450L;RFB:rpoB:S450L;MFX:gyrB:E501D,gyrA:S91P;PZA:pncA:I6T;EMB:embB:M306V
0001815822	TBsq274	lineage 2/beijing sublineage	TBsq274,TBsq665	DS		DR	INH;Eto	INH:fabG1:-15C/T;Eto:fabG1:-15C/T
0002586219	TBsq277	lineage 2/beijing sublineage	NA			Pre-XDR	INH;LFX;RFP;Sm;MFX;PZA;EMB	INH:katG:S315T;LFX:gyrA:D94N;RFP:rpoB:H445L;Sm:rrs:514A/C;MFX:gyrA:D94N;PZA:pncA:T47I;EMB:embB:G406D
0008620520	TBsq29	lineage 2	NA	Pre-XDR	Cs;INH;LFX;MFX;RFP;EMB	Pre-XDR	INH;LFX;RFP;Cfz;MFX;PZA;EMB	INH:katG:S315T;LFX:gyrA:A90V;RFP:rpoB:D435Y;Cfz:Rv0678:R94L;MFX:gyrA:A90V;PZA:pncA:T100P;EMB:embB:M306I
0000106296	TBsq291	lineage 2/beijing sublineage	TBsq291,TBsq294			RR	RFP;RFB;Sm	RFP:rpoB:S450L;RFB:rpoB:S450L;Sm:rrs:514A/C
0000106296	TBsq294	lineage 2/beijing sublineage	TBsq291,TBsq294	DS		Pre-XDR	LFX;RFP;RFB;Sm;MFX	LFX:gyrA:A90V;RFP:rpoB:S450L;RFB:rpoB:S450L;Sm:rrs:514A/C;MFX:gyrA:A90V
0008526557	TBsq303	lineage 4	NA	DS		DS
0008526557	TBsq304	lineage 2/beijing sublineage	NA	DS		DS
0000935537	TBsq310	lineage 2/beijing sublineage	NA	Pre-XDR	INH;LFX;MFX;RFP;RFB;AK;Km;Eto;EMB	Pre-XDR	INH;LFX;Cm;RFP;RFB;Sm;MFX;PZA;EMB;AK;Km;Eto	INH:fabG1:-15C/T,inhA:S94A;LFX:gyrA:D94G;Cm:rrs:1401A/G;RFP:rpoB:S450L;RFB:rpoB:S450L;Sm:rrs:514A/C;MFX:gyrA:D94G;PZA:pncA:A134V;EMB:embB:M306I;AK:rrs:1401A/G;Km:rrs:1401A/G;Eto:fabG1:-15C/T,inhA:S94A
0005309929	TBsq315	lineage 2	TBsq315,TBsq666			Pre-XDR	INH;LFX;RFP;RFB;MFX;EMB	INH:katG:S315T;LFX:gyrA:A90V,gyrA:D94Y;RFP:rpoB:S450L;RFB:rpoB:S450L;MFX:gyrA:A90V,gyrA:D94Y;EMB:embB:M306V
0000191135	TBsq317	lineage 2/beijing sublineage	NA	DR	EMB	Pre-XDR	INH;LFX;RFP;RFB;Sm;MFX;PZA;EMB	INH:katG:S315T;LFX:gyrA:A90V;RFP:rpoB:S450L,rpoC:I491T;RFB:rpoB:S450L;Sm:rpsL:K43R;MFX:gyrA:A90V;PZA:pncA:*187W;EMB:embB:M306V
0000187358	TBsq324	lineage 2/beijing sublineage	TBsq324,TBsq325	DS		DS
0000187358	TBsq325	lineage 2/beijing sublineage	TBsq324,TBsq325	DS		DS
0007959072	TBsq327	lineage 2/beijing sublineage	TBsq221,TBsq327	DS		DS
0000195775	TBsq328	lineage 2/beijing sublineage	TBsq328,TBsq329	DR	Cs;INH;PAS;LFX;MFX;RFB;Eto;EMB	RR	RFP;RFB	RFP:rpoB:S450L;RFB:rpoB:S450L
0000195775	TBsq329	lineage 2/beijing sublineage	TBsq328,TBsq329	DS		RR	RFP;RFB	RFP:rpoB:S450L;RFB:rpoB:S450L
0000178513	TBsq336	lineage 2/beijing sublineage	NA	DS		DS
0005986105	TBsq339	lineage 2/beijing sublineage	NA	Pre-XDR	INH;LFX;Sm;MFX;RFP;RFB;AK;Km;Eto;EMB	Pre-XDR	PTO;INH;LFX;Cm;RFP;RFB;Sm;MFX;EMB;AK;Km;Eto	PTO:ethA:K37S;INH:katG:S315T;LFX:gyrA:D94N;Cm:rrs:1401A/G;RFP:rpoB:S450L;RFB:rpoB:S450L;Sm:rpsL:K43R;MFX:gyrA:D94N;EMB:embB:M306I;AK:rrs:1401A/G;Km:rrs:1401A/G;Eto:ethA:K37S,ethR:-185T/-
0000359746	TBsq34	lineage 2/beijing sublineage	NA	DR	INH;Eto	XDR	PTO;INH;LFX;RFP;RFB;Linezolid;MFX	PTO:ethA:P28R;INH:katG:S315T,iniA:2092C/-,iniC:S58S;LFX:gyrA:D94A;RFP:rpoB:S450L;RFB:rpoB:S450L;Linezolid:rplC:C154R;MFX:gyrA:D94A
0000141046	TBsq340	lineage 2/beijing sublineage	NA	MDR	INH;PAS;Sm;RFP;RFB;EMB	MDR	PAS;INH;RFP;RFB;Sm;EMB	PAS:folC:I43T,folC:I43V;INH:katG:S315T;RFP:rpoB:S450L;RFB:rpoB:S450L;Sm:rpsL:K43R;EMB:embB:M306I
0000013120	TBsq342	lineage 2/beijing sublineage	NA	Pre-XDR	INH;LFX;Sm;MFX;RFP;RFB;AK;Km;Eto;EMB	Pre-XDR	LFX;Cm;RFP;RFB;Sm;MFX;PZA;EMB;AK;Km	LFX:gyrA:D94N;Cm:rrs:1401A/G;RFP:rpoB:S450L;RFB:rpoB:S450L;Sm:rpsL:K43R;MFX:gyrA:D94N;PZA:pncA:S66T;EMB:embB:M306I,embB:D1024N;AK:rrs:1401A/G;Km:rrs:1401A/G
0008550847	TBsq35	lineage 2/beijing sublineage	NA	DS		DS
0000167445	TBsq350	lineage 4	TBsq350,TBsq669	DS		MDR	INH;RFP;RFB;PZA;EMB	INH:katG:S315T,ahpC:-52C/A;RFP:rpoB:S450L;RFB:rpoB:S450L;PZA:pncA:T76P;EMB:embB:D354A
0000192816	TBsq354	lineage 2/beijing sublineage	NA	DS		MDR	INH;RFP;Sm	INH:katG:S315T;RFP:rpoB:D435V;Sm:rpsL:K43R
0004692222	TBsq362	lineage 2/beijing sublineage	NA	DR	INH;LFX;MFX;AK;Km;EMB	Pre-XDR	PTO;INH;LFX;Cm;RFP;Sm;MFX;PZA;EMB;AK;Km	PTO:ethA:E169R;INH:katG:S315T;LFX:gyrA:A90V;Cm:rrs:1401A/G;RFP:rpoB:L452P;Sm:rrs:514A/C;MFX:gyrA:A90V;PZA:pncA:D12A;EMB:embB:M306V;AK:rrs:1401A/G;Km:rrs:1401A/G
0000120613	TBsq363	lineage 2	NA	DS		DS
0000183051	TBsq367	lineage 2/beijing sublineage	TBsq367,TBsq368	DS		MDR	INH;RFP;RFB;Sm;PZA	INH:katG:S315T;RFP:rpoB:S450L;RFB:rpoB:S450L;Sm:rpsL:K43R;PZA:pncA:Q141P
0000183051	TBsq368	lineage 2/beijing sublineage	TBsq367,TBsq368			MDR	INH;RFP;RFB;Sm;PZA	INH:katG:S315T;RFP:rpoB:S450L;RFB:rpoB:S450L;Sm:rpsL:K43R;PZA:pncA:Q141P
0000192846	TBsq385	lineage 4	NA	DR	Cs;INH	DR	INH	INH:katG:S315T
0000161681	TBsq387	lineage 2/beijing sublineage	NA	Pre-XDR	INH;LFX;MFX;RFP	Pre-XDR	PTO;INH;LFX;RFP;RFB;Sm;MFX;PZA;EMB	PTO:ethA:L225A,ethA:K224A,ethA:P160R;INH:fabG1:L203L;LFX:gyrA:D94A;RFP:rpoB:S450L;RFB:rpoB:S450L;Sm:rpsL:K43R;MFX:gyrA:D94A;PZA:pncA:V157G,pncA:V131G;EMB:embB:M306V
0000178934	TBsq391	lineage 2/beijing sublineage	TBsq391,TBsq392	DS		DS
0000178934	TBsq392	lineage 2/beijing sublineage	TBsq391,TBsq392	DS		DS
0000181135	TBsq393	lineage 4	NA	DS		DS
0000194843	TBsq396	lineage 2/beijing sublineage	TBsq396,TBsq397	DS		MDR	INH;RFP;RFB;Sm;PZA;Eto	INH:fabG1:-15C/T;RFP:rpoB:S450L;RFB:rpoB:S450L;Sm:rpsL:K43R;PZA:pncA:G108E;Eto:fabG1:-15C/T
0000194843	TBsq397	lineage 2/beijing sublineage	TBsq396,TBsq397	DR	INH	MDR	INH;RFP;RFB;Sm;PZA;Eto	INH:fabG1:-15C/T;RFP:rpoB:S450L;RFB:rpoB:S450L;Sm:rpsL:K43R;PZA:pncA:G108E;Eto:fabG1:-15C/T
0000181980	TBsq398	lineage 2/beijing sublineage	NA	DS		DS
0000176214	TBsq410	lineage 2/beijing sublineage	NA	DS		DS
0000127364	TBsq414	lineage 2/beijing sublineage	TBsq169,TBsq414,TBsq638,TBsq639			Pre-XDR	PTO;INH;LFX;RFP;RFB;MFX;PZA;EMB	PTO:ethA:K280K;INH:ahpC:-46-/T;LFX:gyrA:D94G;RFP:rpoB:H445Y;RFB:rpoB:H445Y;MFX:gyrA:D94G;PZA:pncA:Q141P;EMB:embB:G406S
0000191518	TBsq416	lineage 2	TBsq416,TBsq417	DS		DS
0000191518	TBsq417	lineage 2	TBsq416,TBsq417	DS		DS
0000176064	TBsq418	lineage 2/beijing sublineage	NA			DS
0000181099	TBsq420	lineage 2/beijing sublineage	TBsq420,TBsq421	DS		RR	RFP	RFP:rpoB:L452P
0000181099	TBsq421	lineage 2/beijing sublineage	TBsq420,TBsq421	DS		RR	RFP	RFP:rpoB:L452P
0000176614	TBsq428	lineage 4	NA	DS		DS
0000185790	TBsq429	lineage 2/beijing sublineage	TBsq429,TBsq430	DS		DS
0000185790	TBsq430	lineage 2/beijing sublineage	TBsq429,TBsq430	DS		DS
189910400261	TBsq431		NA			RR	PTO;RFP;Cfz;PZA	PTO:ethA:P422A,ethA:E420D,ethA:L406*,ethA:L406P,ethA:F401F,ethA:W228*,ethA:R218G,ethA:D217E,ethA:A175A,ethA:A175R,ethA:D174T,ethA:E132V,ethA:E132S,ethA:A128S,ethA:L126Q;RFP:rpoB:L443F;Cfz:pepQ:A355P,pepQ:P352P,pepQ:K350T,pepQ:G347D,pepQ:S66*;PZA:panD:V138A
189910400487	TBsq432	lineage 2/beijing sublineage	NA	DS		DS
0000180189	TBsq434	lineage 2/beijing sublineage	NA	DR	INH;LFX;MFX;EMB	Pre-XDR	INH;LFX;RFP;RFB;Sm;MFX;PZA;EMB	INH:katG:S315T;LFX:gyrA:D94A;RFP:rpoB:S450L;RFB:rpoB:S450L;Sm:rpsL:K43R;MFX:gyrA:D94A;PZA:pncA:-11A/G;EMB:embB:M306V
0000185383	TBsq435	lineage 4	TBsq435,TBsq436	DS		MDR	INH;RFP;RFB;PZA	INH:katG:S315T;RFP:rpoB:S450L;RFB:rpoB:S450L;PZA:pncA:V169T
0000185383	TBsq436	lineage 4	TBsq435,TBsq436	MDR	INH;PAS;RFP;RFB	MDR	INH;RFP;RFB;PZA	INH:katG:S315T;RFP:rpoB:S450L;RFB:rpoB:S450L;PZA:pncA:V169T
0000176163	TBsq437	lineage 4	TBsq437,TBsq438	DS		DS
0000176163	TBsq438	lineage 4	TBsq437,TBsq438	DS		DS
0000195049	TBsq439	lineage 2/beijing sublineage	TBsq439,TBsq440	DS		DS
0000195049	TBsq440	lineage 2/beijing sublineage	TBsq439,TBsq440	DS		DS
0000179814	TBsq441	lineage 2/beijing sublineage	TBsq441,TBsq442	DS		DS
0000179814	TBsq442	lineage 2/beijing sublineage	TBsq441,TBsq442	DR	Cs	DS
0000179966	TBsq443	lineage 4	TBsq443,TBsq444	DR	LFX;MFX	DR	LFX;MFX	LFX:gyrA:D94Y;MFX:gyrA:D94Y
0000179966	TBsq444	lineage 4	TBsq443,TBsq444	DR	LFX;MFX	DR	LFX;MFX	LFX:gyrA:D94Y;MFX:gyrA:D94Y
0000184161	TBsq445	lineage 4	TBsq445,TBsq446	DS		DS
0000184161	TBsq446	lineage 4	TBsq445,TBsq446	DS		DS
0000175471	TBsq451		NA			DR	PTO;Cfz;PZA;EMB	PTO:ethA:R463R,ethA:L462F;Cfz:pepQ:G267P,pepQ:P266R,pepQ:S66*,pepQ:V53A,pepQ:R50R,pepQ:D48D;PZA:panD:V138A,panD:M117I;EMB:ubiA:S244T
0000175471	TBsq452	lineage 2/beijing sublineage	TBsq452,TBsq453	DS		DS
0000180873	TBsq453	lineage 2/beijing sublineage	TBsq452,TBsq453	DS		DS
0000180873	TBsq454	lineage 2/beijing sublineage	TBsq454,TBsq455	DS		DS
0000175882	TBsq455	lineage 2/beijing sublineage	TBsq454,TBsq455	DS		DS
0000175882	TBsq456	lineage 2/beijing sublineage	NA	DS		DS
0000195211	TBsq457	lineage 2/beijing sublineage	NA	DS		DS
0000195211	TBsq458	lineage 2/beijing sublineage	NA	DS		DS
0000183366	TBsq459	lineage 2/beijing sublineage	TBsq459,TBsq460			MDR	INH;RFP;EMB	INH:katG:S315T;RFP:rpoB:D435G;EMB:embB:G406D
0006766284	TBsq46	lineage 2	NA	Pre-XDR	INH;LFX;MFX;RFP;EMB	Pre-XDR	INH;LFX;RFP;Sm;MFX;EMB	INH:katG:S315T;LFX:gyrA:D94A;RFP:rpoB:I491F;Sm:gidB:A134E;MFX:gyrA:D94A;EMB:embB:Q497R
0000183366	TBsq460	lineage 2/beijing sublineage	TBsq459,TBsq460	DR	INH	MDR	INH;RFP;EMB	INH:katG:S315T;RFP:rpoB:D435G;EMB:embB:G406D
0000164244	TBsq461	lineage 2/beijing sublineage	TBsq461,TBsq462	DS		DS
0000164244	TBsq462	lineage 2/beijing sublineage	TBsq461,TBsq462	DS		DS
0000179802	TBsq463	lineage 2/beijing sublineage	TBsq463,TBsq464	DS		DS
0000179802	TBsq464	lineage 2/beijing sublineage	TBsq463,TBsq464			DS
0000180059	TBsq465	lineage 2/beijing sublineage	TBsq465,TBsq466			DS
0000180059	TBsq466	lineage 2/beijing sublineage	TBsq465,TBsq466	DS		DS
0000193293	TBsq467	lineage 2/beijing sublineage	TBsq467,TBsq468	DS		DS
0000193293	TBsq468	lineage 2/beijing sublineage	TBsq467,TBsq468	DS		DS
0000190732	TBsq473	lineage 4	NA	DS		DS
0000177507	TBsq475	lineage 2/beijing sublineage	NA	DS		DS
0000186851	TBsq476	lineage 2/beijing sublineage	NA	DS		DS
0000186851	TBsq477	lineage 2/beijing sublineage	NA	DS		DS
0000176815	TBsq478	lineage 2/beijing sublineage	TBsq478,TBsq479	DS		DS
0000176815	TBsq479	lineage 2/beijing sublineage	TBsq478,TBsq479	DS		DS
0000188354	TBsq481	lineage 2/beijing sublineage	NA	DS		DS
0000177117	TBsq482	lineage 2	NA	DS		DS
0000175572	TBsq484	lineage 2/beijing sublineage	TBsq484,TBsq485	DR	Sm	DR	Sm	Sm:rpsL:K43R
0000175572	TBsq485	lineage 2/beijing sublineage	TBsq484,TBsq485	DR	Sm	DR	Sm	Sm:rpsL:K43R
0008766649	TBsq486	lineage 2/beijing sublineage	TBsq486,TBsq487	DS		DS
0000193746	TBsq487	lineage 2/beijing sublineage	TBsq486,TBsq487	DS		DS
0000185703	TBsq488	lineage 2/beijing sublineage	TBsq488,TBsq489	DS		RR	RFP;RFB;EMB	RFP:rpoB:S450L;RFB:rpoB:S450L;EMB:embB:M306V
0000185703	TBsq489	lineage 2/beijing sublineage	TBsq488,TBsq489	RR	RFP;RFB	RR	RFP;RFB;EMB	RFP:rpoB:S450L;RFB:rpoB:S450L;EMB:embB:M306V
0000168214	TBsq490	lineage 4	TBsq490,TBsq491	Pre-XDR	INH;LFX;MFX;RFP;EMB	Pre-XDR	LFX;RFP;MFX;EMB	LFX:gyrA:G88A,gyrA:A90V,gyrA:D94G;RFP:rpoB:D435Y;MFX:gyrA:G88A,gyrA:A90V,gyrA:D94G;EMB:embB:M306I
0000168214	TBsq491	lineage 4	TBsq490,TBsq491			Pre-XDR	LFX;RFP;MFX;EMB	LFX:gyrA:D94G;RFP:rpoB:D435Y;MFX:gyrA:D94G;EMB:embB:M306I
0000180994	TBsq492	lineage 2/beijing sublineage	TBsq492,TBsq493	DS		DS
0000180994	TBsq493	lineage 2/beijing sublineage	TBsq492,TBsq493	DS		DS
0000154206	TBsq494	lineage 2/beijing sublineage	NA	DS		DS
0008724259	TBsq496	lineage 2/beijing sublineage	TBsq496,TBsq497	DS		DS
0008724259	TBsq497	lineage 2/beijing sublineage	TBsq496,TBsq497	DS		DS
0000190826	TBsq498	lineage 1	TBsq498,TBsq499,TBsq500	DS		DS
0000190826	TBsq499	lineage 1	TBsq498,TBsq499,TBsq500	DS		DS
0000190826	TBsq500	lineage 1	TBsq498,TBsq499,TBsq500	DR	MFX	DS
0000196398	TBsq503	lineage 2/beijing sublineage	TBsq503,TBsq504	DS		DS
0000196398	TBsq504	lineage 2/beijing sublineage	TBsq503,TBsq504	DS		DS
0000181674	TBsq505	lineage 2/beijing sublineage	TBsq505,TBsq506	DS		DS
0000181674	TBsq506	lineage 2/beijing sublineage	TBsq505,TBsq506	DS		DS
0000183068	TBsq507	lineage 4	TBsq507,TBsq508	DR	INH	DR	INH	INH:katG:S315R,katG:S315T
0000183068	TBsq508	lineage 4	TBsq507,TBsq508	DS		DR	INH	INH:katG:S315R,katG:S315T
0000190844	TBsq509	lineage 4	TBsq509,TBsq510	DR	INH	DR	INH	INH:katG:S315T
0000190844	TBsq510	lineage 4	TBsq509,TBsq510	DS		DR	INH	INH:katG:S315T
0000190844	TBsq511	lineage 4	TBsq509,TBsq510,TBsq511	DR	INH	DR	INH	INH:katG:S315T
0000188273	TBsq512	lineage 4	TBsq512,TBsq513			DS
0000188273	TBsq513	lineage 4	TBsq512,TBsq513			DS
0000191775	TBsq514	lineage 2/beijing sublineage	TBsq514,TBsq515	DS		DS
0000191775	TBsq515	lineage 2/beijing sublineage	TBsq514,TBsq515	DS		DS
0000188029	TBsq516	lineage 2/beijing sublineage	TBsq516,TBsq517	DR	INH	DR	INH;Sm;Eto	INH:fabG1:-15C/T;Sm:rpsL:K43R;Eto:fabG1:-15C/T
0000188029	TBsq517	lineage 2/beijing sublineage	TBsq516,TBsq517	DR	Sm	DR	INH;Sm;Eto	INH:fabG1:-15C/T;Sm:rpsL:K43R;Eto:fabG1:-15C/T
0000189051	TBsq518	lineage 2/beijing sublineage	TBsq518,TBsq519	DR	Sm	DR	Sm	Sm:rpsL:K43R
0000189051	TBsq519	lineage 2/beijing sublineage	TBsq518,TBsq519	DR	Sm	DR	Sm	Sm:rpsL:K43R
0000194904	TBsq520	lineage 2/beijing sublineage	TBsq520,TBsq521	DR	Sm	DR	Sm;PZA	Sm:rrs:514A/C;PZA:pncA:T167I
0000194904	TBsq521	lineage 2/beijing sublineage	TBsq520,TBsq521	DS		DR	Sm;PZA	Sm:rrs:514A/C;PZA:pncA:T167I
0000140175	TBsq522	lineage 2/beijing sublineage	TBsq522,TBsq523	DS		DS
0000140175	TBsq523	lineage 2/beijing sublineage	TBsq522,TBsq523	DS		DS
0000192694	TBsq524	lineage 2/beijing sublineage	TBsq524,TBsq525	Pre-XDR	Cs;INH;LFX;Sm;MFX;RFP;RFB;Eto;EMB	Pre-XDR	INH;LFX;RFP;RFB;Sm;MFX;EMB;Eto	INH:fabG1:-15C/T;LFX:gyrA:D94G;RFP:rpoB:S450L,rpoB:I480V;RFB:rpoB:S450L;Sm:rpsL:K43R;MFX:gyrA:D94G;EMB:embB:M306I;Eto:fabG1:-15C/T
0000192694	TBsq525	lineage 2/beijing sublineage	TBsq524,TBsq525	Pre-XDR	INH;LFX;Sm;MFX;RFP;RFB;Eto	Pre-XDR	INH;LFX;RFP;RFB;Sm;MFX;EMB;Eto	INH:fabG1:-15C/T;LFX:gyrA:D94G;RFP:rpoB:S450L,rpoB:I480V;RFB:rpoB:S450L;Sm:rpsL:K43R;MFX:gyrA:D94G;EMB:embB:M306I;Eto:fabG1:-15C/T
0000181459	TBsq526	lineage 2/beijing sublineage	TBsq526,TBsq527	DR	INH;EMB	MDR	PTO;INH;RFP;RFB;Sm;EMB	PTO:ethA:V489G;INH:katG:S315T;RFP:rpoB:S450L;RFB:rpoB:S450L;Sm:rpsL:K43R;EMB:embB:M306L
0000181459	TBsq527	lineage 2/beijing sublineage	TBsq526,TBsq527	DS		MDR	PTO;INH;RFP;RFB;Sm;EMB	PTO:ethA:V489G;INH:katG:S315T;RFP:rpoB:S450L;RFB:rpoB:S450L;Sm:rpsL:K43R;EMB:embB:M306L
0000194138	TBsq528	lineage 2/beijing sublineage	TBsq528,TBsq529	DS		DS
0000194138	TBsq529	lineage 2/beijing sublineage	TBsq528,TBsq529	DS		DS
0000179826	TBsq530	lineage 2/beijing sublineage	TBsq530,TBsq531	DS		DR	INH;Sm	INH:katG:S315T;Sm:rpsL:K88R
0000179826	TBsq531	lineage 2/beijing sublineage	TBsq530,TBsq531	DS		DR	INH;Sm	INH:katG:S315T;Sm:rpsL:K88R
0000192947	TBsq532	lineage 2/beijing sublineage	TBsq532,TBsq533	DR	INH;Sm	DR	INH;Sm;EMB	INH:katG:S315T;Sm:rpsL:K43R;EMB:embB:M306L
0000192947	TBsq533	lineage 2/beijing sublineage	TBsq532,TBsq533	DR	INH;Sm	DR	INH;Sm;EMB	INH:katG:S315T;Sm:rpsL:K43R;EMB:embB:M306L
0000181059	TBsq534	lineage 1	TBsq534,TBsq535	DS		DS
0000181059	TBsq535	lineage 1	TBsq534,TBsq535	DS		DS
0000181059	TBsq536	lineage 1	TBsq534,TBsq535,TBsq536	DS		DS
0000193980	TBsq537	lineage 4	TBsq537,TBsq538	DR	LFX;MFX	DR	LFX;MFX	LFX:gyrA:D94N;MFX:gyrA:D94N
0000193980	TBsq538	lineage 4	TBsq537,TBsq538	DS		DR	LFX;MFX	LFX:gyrA:D94N;MFX:gyrA:D94N
0000185313	TBsq539	lineage 4	TBsq539,TBsq540	DS		DS
0000185313	TBsq540	lineage 4	TBsq539,TBsq540	DS		DS
0000180968	TBsq541	lineage 4	TBsq541,TBsq542	DS		DS
0000180968	TBsq542	lineage 4	TBsq541,TBsq542	DS		DS
0000181526	TBsq543	lineage 4	TBsq543,TBsq544	DS		DS
0000181526	TBsq544	lineage 4	TBsq543,TBsq544	DS		DS
0000149046	TBsq545	lineage 2/beijing sublineage	TBsq545,TBsq546,TBsq547	DS		DS
0000149046	TBsq546	lineage 2/beijing sublineage	TBsq545,TBsq546,TBsq547	DS		DS
0000149046	TBsq547	lineage 2/beijing sublineage	TBsq545,TBsq546,TBsq547	DS		DS
0002116639	TBsq55	lineage 4	NA	DS		DS
0000152956	TBsq551	lineage 2/beijing sublineage	TBsq551,TBsq552	DS		DS
0000152956	TBsq552	lineage 2/beijing sublineage	TBsq551,TBsq552	DS		DS
0000151799	TBsq553	lineage 4	TBsq553,TBsq554	DS		DS
0000151799	TBsq554	lineage 4	TBsq553,TBsq554	DS		DS
0000158536	TBsq555	lineage 2/beijing sublineage	TBsq555,TBsq556	DS		DS
0006612844	TBsq556	lineage 2/beijing sublineage	TBsq555,TBsq556	DS		DS
0000153823	TBsq561	lineage 2/beijing sublineage	NA	DS		DS
0000152821	TBsq562	lineage 4	NA	MDR	Cs;INH;RFP;RFB	MDR	INH;RFP;RFB	INH:katG:S315T;RFP:rpoB:S450L;RFB:rpoB:S450L
0000152046	TBsq564	lineage 2/beijing sublineage	TBsq564,TBsq565	DR	Cs	DS
0000152046	TBsq565	lineage 2/beijing sublineage	TBsq564,TBsq565	DS		DS
0000134807	TBsq568	lineage 4	TBsq568,TBsq569	DS		DS
0000134807	TBsq569	lineage 4	TBsq568,TBsq569	DS		DS
0000146772	TBsq570	lineage 2/beijing sublineage	TBsq570,TBsq571			Pre-XDR	INH;LFX;RFP;RFB;Sm;MFX;EMB	INH:katG:S315T;LFX:gyrA:A90V;RFP:rpoB:S450L;RFB:rpoB:S450L;Sm:rpsL:K43R;MFX:gyrA:A90V;EMB:embA:-12C/T,embB:M306L
0000146772	TBsq571	lineage 2/beijing sublineage	TBsq570,TBsq571			Pre-XDR	INH;LFX;RFP;RFB;Sm;MFX;EMB	INH:katG:S315T;LFX:gyrA:A90V;RFP:rpoB:S450L;RFB:rpoB:S450L;Sm:rpsL:K43R;MFX:gyrA:A90V;EMB:embA:-12C/T,embB:M306L
0000144376	TBsq573	lineage 2/beijing sublineage	NA	DS		RR	RFP;RFB	RFP:rpoB:S450L;RFB:rpoB:S450L
0000149080	TBsq574	lineage 2/beijing sublineage	TBsq574,TBsq575,TBsq576	DS		DS
0000149080	TBsq575	lineage 2/beijing sublineage	TBsq574,TBsq575,TBsq576	DS		DS
0000149080	TBsq576	lineage 2/beijing sublineage	TBsq574,TBsq575,TBsq576	DS		DS
0000148238	TBsq578	lineage 4	NA	DS		DS
0000160784	TBsq581	lineage 2/beijing sublineage	TBsq581,TBsq582	DS		DS
0000160784	TBsq582	lineage 2/beijing sublineage	TBsq581,TBsq582	DS		DS
0000142205	TBsq583	lineage 4	TBsq583,TBsq584,TBsq585	MDR	INH;RFP	MDR	INH;RFP;RFB;PZA;EMB	INH:katG:S315T;RFP:rpoB:S450L;RFB:rpoB:S450L;PZA:pncA:V163C;EMB:embB:M306I
0000142205	TBsq584	lineage 4	TBsq583,TBsq584,TBsq585	MDR	INH;RFP	MDR	INH;RFP;RFB;PZA;EMB	INH:katG:S315T;RFP:rpoB:S450L;RFB:rpoB:S450L;PZA:pncA:V163C;EMB:embB:M306I
0000142205	TBsq585	lineage 4	TBsq583,TBsq584,TBsq585	MDR	INH;RFP;RFB	MDR	INH;RFP;RFB;PZA;EMB	INH:katG:S315T;RFP:rpoB:S450L;RFB:rpoB:S450L;PZA:pncA:V163C;EMB:embB:M306I
0000162296	TBsq586	lineage 4	TBsq586,TBsq587,TBsq588	DS		DS
0000162296	TBsq587	lineage 4	TBsq586,TBsq587,TBsq588			DS
0000162296	TBsq588	lineage 4	TBsq586,TBsq587,TBsq588			DS
0000161661	TBsq590	lineage 2/beijing sublineage	NA	DS		DS
0000160737	TBsq591	lineage 2/beijing sublineage	TBsq591,TBsq592			Pre-XDR	INH;LFX;RFP;MFX;PZA;EMB	INH:katG:S315T;LFX:gyrA:D94G;RFP:rpoB:S431G,rpoB:D435Y,rpoB:D435V;MFX:gyrA:D94G;PZA:pncA:A146V;EMB:embB:M306V
0000160737	TBsq592	lineage 2/beijing sublineage	TBsq591,TBsq592			Pre-XDR	INH;LFX;RFP;MFX;PZA;EMB	INH:katG:S315T;LFX:gyrA:D94G;RFP:rpoB:S431G,rpoB:D435Y,rpoB:D435V;MFX:gyrA:D94G;PZA:pncA:A146V;EMB:embB:M306V
0000160737	TBsq593	lineage 4	NA	DS		DS
0000153022	TBsq594	lineage 2/beijing sublineage	TBsq594,TBsq595	DS		DS
0000153022	TBsq595	lineage 2/beijing sublineage	TBsq594,TBsq595	DS		DS
0000156503	TBsq598	lineage 2/beijing sublineage	NA	DR	INH	MDR	INH;RFP;RFB;Sm;PZA;EMB	INH:katG:S315T;RFP:rpoB:S450L;RFB:rpoB:S450L;Sm:rpsL:K43R;PZA:pncA:-11A/G;EMB:embB:G406D
0000626093	TBsq6	lineage 2/beijing sublineage	NA	Pre-XDR	Cs;INH;PAS;LFX;Sm;MFX;RFP;RFB;AK;Km;Eto;EMB	Pre-XDR	PAS;INH;LFX;RFP;Sm;MFX;EMB	PAS:folC:S150C;INH:katG:S315T;LFX:gyrA:D94G;RFP:rpoB:D435G;Sm:rpsL:K43R;MFX:gyrA:D94G;EMB:embB:Q445R
0000155013	TBsq601	lineage 4	NA	DS		DS
0000153028	TBsq603	lineage 2/beijing sublineage	TBsq603,TBsq604	DR	Cs	DS
0000153028	TBsq604	lineage 2/beijing sublineage	TBsq603,TBsq604	DS		DS
0000145712	TBsq605	lineage 2/beijing sublineage	TBsq605,TBsq606	DS		DS
0000145712	TBsq606	lineage 2/beijing sublineage	TBsq605,TBsq606	DS		DS
0000147895	TBsq609	lineage 2/beijing sublineage	TBsq609,TBsq610	DS		DS
0000147895	TBsq610	lineage 2/beijing sublineage	TBsq609,TBsq610	DS		DS
0000160325	TBsq611	lineage 4	TBsq611,TBsq612	DR	INH	DR	INH	INH:katG:S315T
0000160325	TBsq612	lineage 4	TBsq611,TBsq612	DR	INH	DR	INH	INH:katG:S315T
0000153790	TBsq613	lineage 2/beijing sublineage	NA	DS		DR	Sm	Sm:rrs:514A/C
0000154361	TBsq617	lineage 2/beijing sublineage	NA	DS		DR	Sm	Sm:rpsL:K43R
0000154361	TBsq618	lineage 4	NA	DS		DS
0000161956	TBsq621	lineage 2/beijing sublineage	TBsq621,TBsq622	DR	INH;EMB	DR	INH;Sm;PZA;EMB	INH:katG:S315T;Sm:rpsL:K43R;PZA:pncA:T114A,pncA:D49G;EMB:embB:M306V,ubiA:A237V
0000161956	TBsq622	lineage 2/beijing sublineage	TBsq621,TBsq622	DR	INH;EMB	DR	INH;Sm;PZA;EMB	INH:katG:S315T;Sm:rpsL:K43R;PZA:pncA:T114A,pncA:D49G;EMB:embB:M306V,ubiA:A237V
0000132121	TBsq626	lineage 2/beijing sublineage	NA	DR	Sm	DR	Sm	Sm:rpsL:K43R
0000164785	TBsq631	lineage 2	NA	DS		DS
0000127364	TBsq638	lineage 2/beijing sublineage	TBsq169,TBsq414,TBsq638,TBsq639	Pre-XDR	INH;LFX;MFX;RFP;Km;EMB	Pre-XDR	PTO;INH;LFX;Cm;RFP;RFB;MFX;PZA;EMB;AK;Km	PTO:ethA:K280K;INH:ahpC:-46-/T;LFX:gyrA:D94G;Cm:rrs:1401A/G;RFP:rpoB:H445Y;RFB:rpoB:H445Y;MFX:gyrA:D94G;PZA:pncA:Q141P;EMB:embB:G406S;AK:rrs:1401A/G;Km:rrs:1401A/G
0000127364	TBsq639	lineage 2/beijing sublineage	TBsq169,TBsq414,TBsq638,TBsq639			Pre-XDR	PTO;INH;LFX;Cm;RFP;RFB;MFX;PZA;EMB;AK;Km	PTO:ethA:K280K;INH:ahpC:-46-/T;LFX:gyrA:D94G;Cm:rrs:1401A/G;RFP:rpoB:H445Y;RFB:rpoB:H445Y;MFX:gyrA:D94G;PZA:pncA:Q141P;EMB:embB:G406S;AK:rrs:1401A/G;Km:rrs:1401A/G
0000171009	TBsq640	lineage 4	NA	DS		DS
0000188655	TBsq641	lineage 2/beijing sublineage	NA			MDR	INH;RFP;RFB;Sm;PZA;EMB	INH:katG:S315T;RFP:rpoB:S450L;RFB:rpoB:S450L;Sm:rpsL:K43R;PZA:pncA:R154G;EMB:embB:M1000R
0000124184	TBsq642	lineage 2/beijing sublineage	TBsq642,TBsq644	DR	INH	DR	INH;Sm	INH:katG:S315T;Sm:rpsL:K88R
0000124184	TBsq644	lineage 2/beijing sublineage	TBsq642,TBsq644	DS		DR	INH;Sm	INH:katG:S315T;Sm:rpsL:K88R
0000272840	TBsq646	lineage 2/beijing sublineage	TBsq142,TBsq646	Pre-XDR	INH;LFX;MFX;RFP	Pre-XDR	INH;LFX;RFP;MFX	INH:katG:S315T;LFX:gyrA:S91P;RFP:rpoB:D435V;MFX:gyrA:S91P
0005774802	TBsq647	lineage 2/beijing sublineage	TBsq146,TBsq647	Pre-XDR	INH;LFX;Sm;MFX;RFP;RFB;EMB	Pre-XDR	LFX;RFP;RFB;Sm;MFX;EMB	LFX:gyrA:D94N,gyrA:D94G;RFP:rpoB:H445D;RFB:rpoB:H445D;Sm:rpsL:K43R;MFX:gyrA:D94N,gyrA:D94G;EMB:embB:M306V
0005898469	TBsq649		NA			RR	PTO;RFP;Cfz	PTO:ethA:I356T,ethA:A354A,ethA:Q269R,ethA:L267L,ethA:P160P,ethA:G159G,ethA:F157L,ethA:D156D,ethA:D156I,ethA:R150*,ethA:E132V,ethA:E132S,ethA:A128A,ethA:A128Q,ethA:S110C,ethA:S110K,ethA:M41G,ethA:E39A,ethA:T29T,ethA:C27C;RFP:rpoB:S431T,rpoB:L443F;Cfz:pepQ:E353Q,pepQ:K350S,pepQ:P349P,pepQ:V172V,pepQ:E177E,pepQ:L142H,pepQ:L140L,pepQ:A90R,pepQ:E89E,pepQ:S66*
0004555784	TBsq65	lineage 2/beijing sublineage	TBsq65,TBsq66	DR	Cs	DS
0000179735	TBsq654	lineage 4	TBsq170,TBsq654	DS		DS
0000179735	TBsq655	lineage 4	TBsq170,TBsq654,TBsq655	DS		DS
0003463842	TBsq656	lineage 2/beijing sublineage	TBsq183,TBsq656	DR	INH;EMB	MDR	PAS;INH;RFP;RFB;Sm;PZA;EMB	PAS:thyA:R235P;INH:katG:S315T;RFP:rpoB:A286V,rpoB:S450L;RFB:rpoB:S450L;Sm:rpsL:K88R;PZA:pncA:G132D;EMB:embB:M306I
3463842	TBsq657	lineage 2/beijing sublineage	TBsq183,TBsq656,TBsq657			MDR	PAS;INH;RFP;RFB;Sm;PZA;EMB	PAS:thyA:R235P;INH:katG:S315T;RFP:rpoB:A286V,rpoB:S450L;RFB:rpoB:S450L;Sm:rpsL:K88R;PZA:pncA:G132D;EMB:embB:M306I
0004555784	TBsq66	lineage 2/beijing sublineage	TBsq65,TBsq66	DS		DS
131419	TBsq661	lineage 2/beijing sublineage	NA	DS		DS
8698970	TBsq662	lineage 4	NA	DS		DS
8025372	TBsq663	lineage 2/beijing sublineage	TBsq243,TBsq663	DS		DS
140734	TBsq664	lineage 2/beijing sublineage	TBsq268,TBsq664	Pre-XDR	INH;LFX;MFX;RFP;EMB	Pre-XDR	INH;LFX;RFP;RFB;MFX;PZA;EMB	INH:ahpC:-52C/T;LFX:gyrB:E501D,gyrA:S91P;RFP:rpoB:S450L;RFB:rpoB:S450L;MFX:gyrB:E501D,gyrA:S91P;PZA:pncA:I6T;EMB:embB:M306V
115252	TBsq665	lineage 2/beijing sublineage	TBsq274,TBsq665	DR	INH	DR	INH;Eto	INH:fabG1:-15C/T;Eto:fabG1:-15C/T
148648	TBsq666	lineage 2	TBsq315,TBsq666			Pre-XDR	INH;LFX;RFP;RFB;MFX;EMB	INH:katG:S315T;LFX:gyrA:A90V,gyrA:D94Y;RFP:rpoB:S450L;RFB:rpoB:S450L;MFX:gyrA:A90V,gyrA:D94Y;EMB:embB:M306V
168492	TBsq668	lineage 2/beijing sublineage	NA	DS		DS
7847734	TBsq669	lineage 4	TBsq350,TBsq669	MDR	INH;Sm;RFP;RFB;EMB	MDR	INH;RFP;RFB;PZA;EMB	INH:katG:S315T,ahpC:-52C/A;RFP:rpoB:S450L;RFB:rpoB:S450L;PZA:pncA:T76P;EMB:embB:D354A
4766942	TBsq670	lineage 2/beijing sublineage	NA	DS		DS
0000064592	TBsq71	lineage 2/beijing sublineage	TBsq71,TBsq72	Pre-XDR	INH;MFX;RFP;RFB;Km	DR	INH;PZA;EMB	INH:katG:S315T;PZA:pncA:R140A;EMB:embA:-12C/T
0000064592	TBsq72	lineage 2/beijing sublineage	TBsq71,TBsq72	MDR	Cs;INH;RFP;RFB	DR	INH;PZA;EMB	INH:katG:S315T;PZA:pncA:R140A;EMB:embA:-12C/T
0000190441	TBsq76	lineage 2/beijing sublineage	TBsq76,TBsq77	Pre-XDR	INH;LFX;Sm;MFX;RFP;RFB;EMB	Pre-XDR	INH;LFX;RFP;Sm;MFX;PZA;EMB	INH:katG:S315T;LFX:gyrA:A90V;RFP:rpoB:F424L;Sm:rpsL:K43R;MFX:gyrA:A90V;PZA:pncA:H82L;EMB:embB:Q497R,embB:D1024N
0000190441	TBsq77	lineage 2/beijing sublineage	TBsq76,TBsq77	Pre-XDR	INH;LFX;Sm;MFX;RFP;RFB;Km;EMB	Pre-XDR	INH;LFX;RFP;Sm;MFX;PZA;EMB	INH:katG:S315T;LFX:gyrA:A90V;RFP:rpoB:F424L;Sm:rpsL:K43R;MFX:gyrA:A90V;PZA:pncA:H82L;EMB:embB:Q497R,embB:D1024N
0000653841	TBsq83	lineage 2/beijing sublineage	NA	Pre-XDR	INH;LFX;Sm;MFX;RFP;RFB;EMB	Pre-XDR	INH;LFX;RFP;RFB;Sm;MFX;PZA;EMB	INH:katG:S315T;LFX:gyrA:D94G;RFP:rpoB:S450L;RFB:rpoB:S450L;Sm:rpsL:K43R;MFX:gyrA:D94G;PZA:pncA:Q141P;EMB:embA:-12C/T,embB:M306L
0000141738	TBsq85	lineage 2/beijing sublineage	NA	DR	Cs	DS
0000141738	TBsq86	lineage 2/beijing sublineage	NA	DR	Cs	DS
0000189427	TBsq87	lineage 2/beijing sublineage	TBsq87,TBsq88	Pre-XDR	INH;LFX;MFX;RFP;RFB;AK;Km	Pre-XDR	INH;LFX;Cm;RFP;RFB;MFX;AK;Km	INH:katG:S315T;LFX:gyrA:D94G;Cm:rrs:1401A/G;RFP:rpoB:S450L;RFB:rpoB:S450L;MFX:gyrA:D94G;AK:rrs:1401A/G;Km:rrs:1401A/G
0008694802	TBsq88	lineage 2/beijing sublineage	TBsq87,TBsq88	Pre-XDR	INH;LFX;MFX;RFP;RFB;AK;Km	XDR	INH;LFX;Cm;RFP;RFB;Linezolid;MFX;AK;Km	INH:katG:S315T;LFX:gyrA:D94G;Cm:rrs:1401A/G;RFP:rpoB:S450L;RFB:rpoB:S450L;Linezolid:rplC:C154R;MFX:gyrA:D94G;AK:rrs:1401A/G;Km:rrs:1401A/G
0004514265	TBsq90	lineage 2	NA	DR	Cs	DS
0000126792	TBsq91	lineage 2/beijing sublineage	NA	Pre-XDR	Cs;INH;PAS;LFX;Sm;MFX;RFP;RFB;AK;Km;EMB	Pre-XDR	PTO;INH;LFX;Cm;RFP;RFB;Sm;MFX;EMB;AK;Km	PTO:ethA:A252A;INH:katG:S315T;LFX:gyrA:D94H;Cm:rrs:1401A/G;RFP:rpoB:S450L;RFB:rpoB:S450L;Sm:rpsL:K43R;MFX:gyrA:D94H;EMB:embB:M306V;AK:rrs:1401A/G;Km:rrs:1401A/G
131700	TBsq93	lineage 2/beijing sublineage	NA			DR	LFX;MFX	LFX:gyrA:D94G;MFX:gyrA:D94G
0000186361	TBsq95	lineage 2/beijing sublineage	TBsq147,TBsq148,TBsq149,TBsq95,TBsq96	Pre-XDR	Cs;INH;LFX;MFX;RFP;EMB	Pre-XDR	INH;LFX;RFP;MFX;EMB	INH:katG:S315T;LFX:gyrA:A90V;RFP:rpoB:S441P;MFX:gyrA:A90V;EMB:embB:M306V
0000186361	TBsq96	lineage 2/beijing sublineage	TBsq147,TBsq148,TBsq149,TBsq95,TBsq96	Pre-XDR	INH;LFX;MFX;RFP;EMB	Pre-XDR	INH;LFX;RFP;MFX;EMB	INH:katG:S315T;LFX:gyrA:A90V;RFP:rpoB:S441P;MFX:gyrA:A90V;EMB:embB:M306V
